# Supplementary material for: Synergistic effects of fibrin-enriched adipose decellularized extracellular matrix (AdECM) and microfluidic model on vascularization
Source: PubMed Central journal article supplement — RSC Adv. 2024 Oct 28;14(46):34143–55. doi: 10.1039/d4ra05573j (PMC11513771; doi:10.1039/d4ra05573j), 2024-10-28
Supplement: RA-014-D4RA05573J-s004.pdf [file RA-014-D4RA05573J-s004.pdf]

## Supporting information

### Title

Synergistic effects of fibrin-enriched adipose decellularized extracellular matrix (AdECM) and microfluidic model on vascularization

### Authors:

Yu-Yin Shih,<sup>a</sup> Chun-Wei Kao,<sup>a</sup> Yi-Rong Jhong,<sup>a</sup> Yi-An Chen<sup>a</sup> and Yi-Wen Chen<sup>\*a,b,c</sup>

### Affiliations:

- a. Research & Development Center for  $\alpha$ -Dimensional Extracellular Vesicles, China Medical University Hospital, Taichung, 404332, Taiwan
- b. Department of Bioinformatics and Medical Engineering, Asia University, Taichung, 41354 Taiwan
- c. Graduate Institute of Biomedical Sciences, China Medical University, Taichung, 406040 Taiwan

\*Corresponding author: Yi-Wen Chen

E-mail address: [evinchen@gmail.com](mailto:evinchen@gmail.com)

**Fig. S1 Formation of microvasculature on different matrices.** Fluorescence images of vasculature stained with F-actin after HUVECs and HDFs were cultured for 7 days. Self-assembled microvascular network on the matrices of fibrin and AdECM at concentrations of 0.5%, 0.75%, or 1%. Scale bar = 100  $\mu$ m.

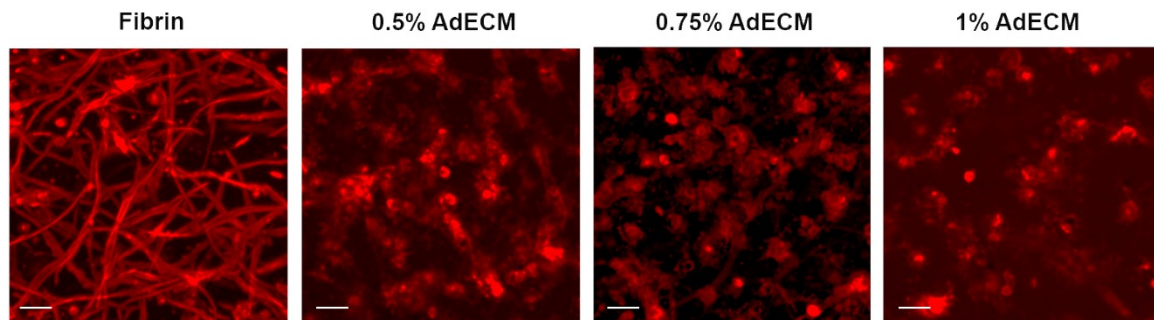

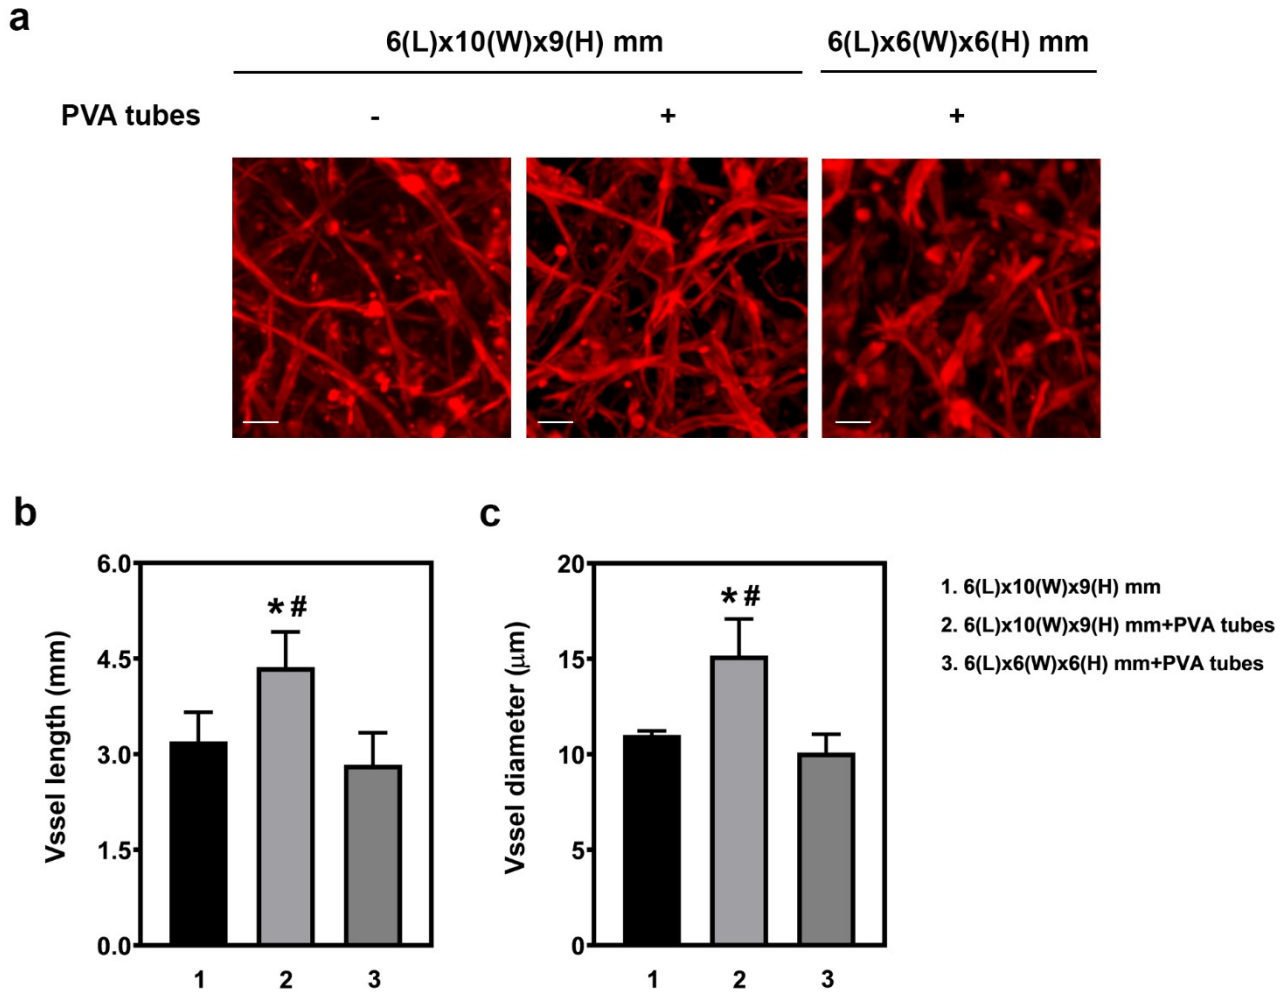

**Fig. S2 Optimization of microfluidic device to improve the efficiency of media supply.** Immunofluorescence staining of vasculature with anti-F-actin antibody: (a) After cultivating HUVECs and HDFs within a fibrin matrix containing 0.5% AdECM for 5 days in a microfluidic device placed on a rocker, a self-assembled microvascular network formed. The device dimensions were either 6(L) x 10(W) x 9(H) mm or 6(L) x 6(W) x 6(H) mm. Experiments were conducted with and without PVA tubes. Scale bar = 100 μm. (b, c) Vessel length and diameter were measured using ImageJ software and analyzed using Student's *t*-test from three independent experiments. \**P*<0.05, compared to vessels cultured in the device sized 6(L) x 10(W) x 9(H) mm without PVA tubes; #*P*<0.05, compared to a device sized 6(L) x 6(W) x 6(H) mm.

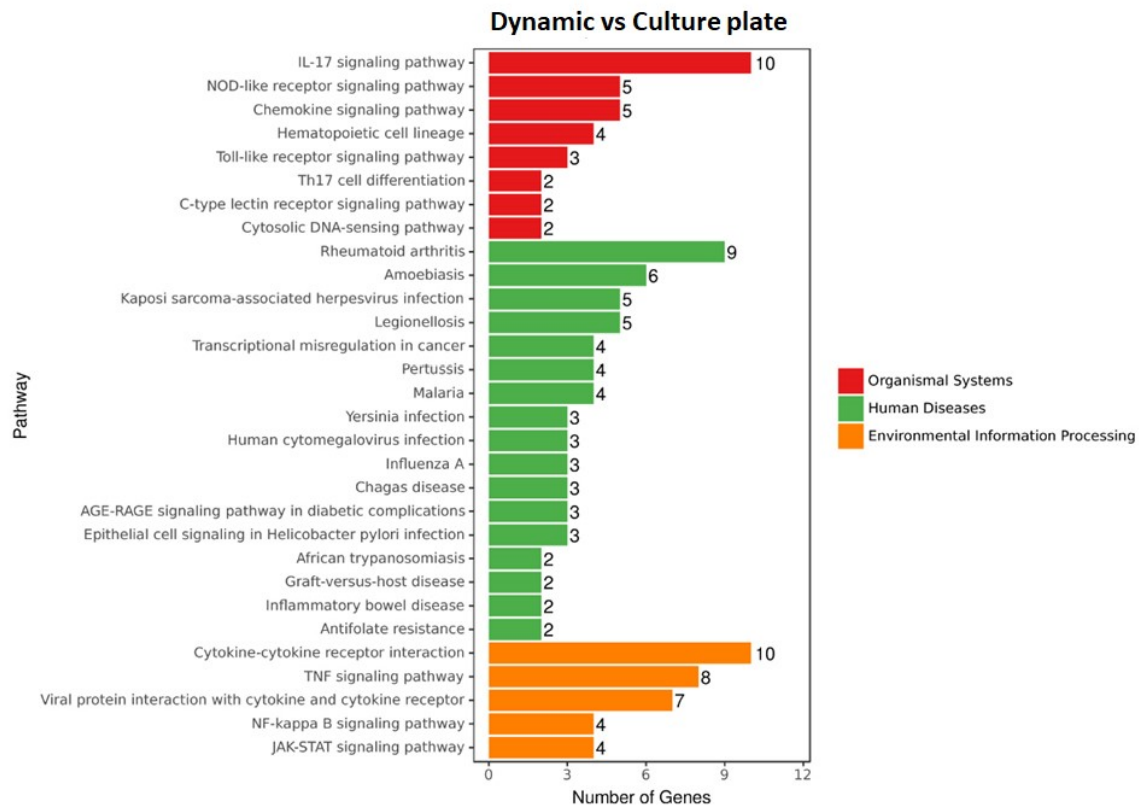

**Fig. S3 Transcriptomic profile of vasculature formed within AdECM-containing gel in a culture plate or a microfluidic device (Dynamic) was analyzed by KEGG pathway.**

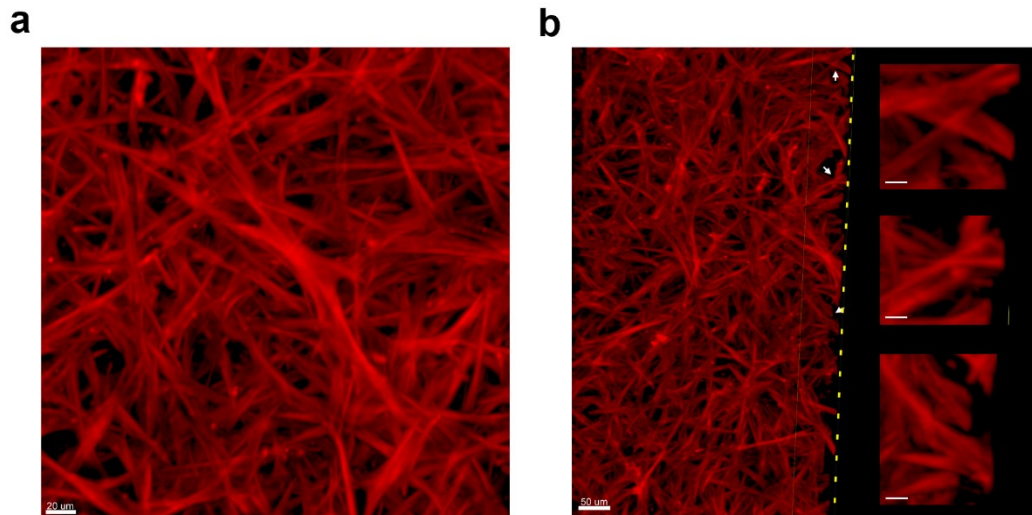

**Fig. S4 Vasculature cultivated in a microfluidic system with an AdECM/Fibrin matrix displayed an intricate network and luminal structure.** (a) HUVECs and HDFs were co-cultured in the AdECM/Fibrin matrix for 14 days, followed by immunofluorescence staining with an anti-F-actin antibody. Scale bar = 20  $\mu\text{m}$ . (b) The 3D sectional view along the y-z plane of the vascular network. Scale bar = 50  $\mu\text{m}$ . The yellow dashed line indicates the y-z cross-section area. The enlarged view shows the luminal structure of the vascular network as indicated by white arrows. Scale bar = 10  $\mu\text{m}$ . 3D reconstructions of images and y-z cross-sections were conducted using Imaris software (Oxford).

**Fig. S5 The movie displayed a 3D reconstructed image of vascular network.**

**Fig. S6 The movie showed the Y-Z cross-sectional images of the vasculature.**

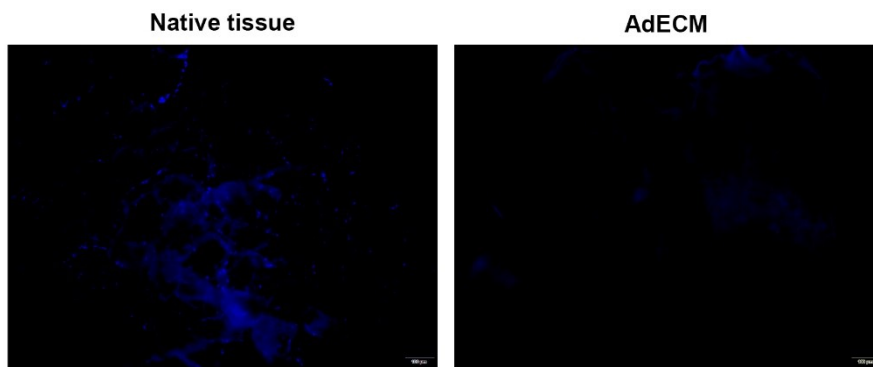

**Fig. S7 DNA Content in Native Tissue and AdECM.** Nuclei were stained with DAPI (blue) to visualize the presence of DNA. Scale bar = 100  $\mu\text{m}$ .

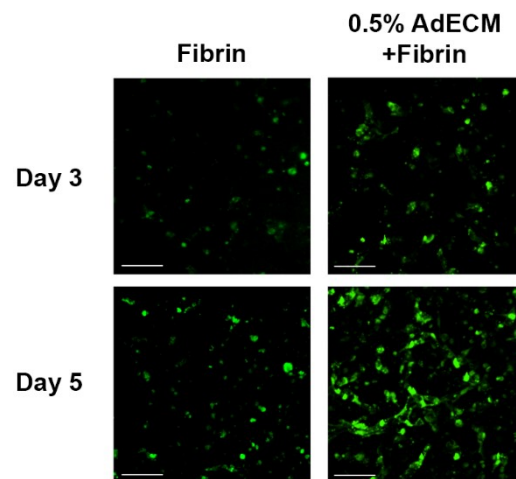

**Fig. S8 VEGF content in fibrin and 0.5% AdECM/fibrin matrices.** Expression of VEGF in matrix was detected by immunofluorescence staining with anti-VEGF antibody (green) after co-culturing of HUVECs and HDFs for 3 or 5 days. Scale bar = 100  $\mu$ m.

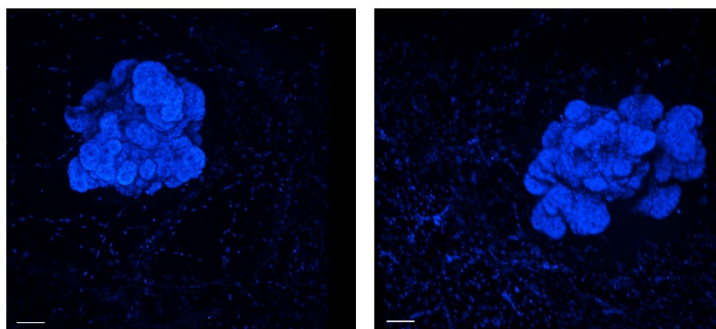

**Fig. S9** The nuclei of vascularized colon tumoroids were visualized by DAPI staining. Scale bar = 100  $\mu\text{m}$ .

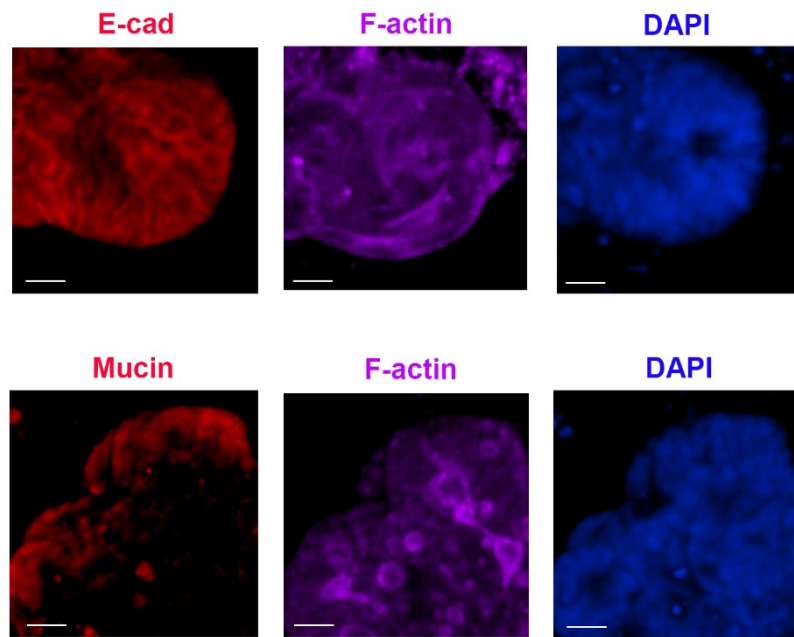

**Fig. S10 Identification of human colon tumoroids.** Immunofluorescence staining of human colon tumoroids with antibodies targeting for E-cadherin (E-Cad), a marker for enterocyte, and mucin, a marker for goblet cell. Scale bar = 25  $\mu\text{m}$ .
